# Supplementary material
Source: HighWire-hosted journal article supplement (http://www.ajnr.org/highwire/filestream/61092/field_highwire_adjunct_files/0/17-01138.pdf)
Supplement: 17-01138.pdf [file 17-01138.pdf]

**On-line Table 1: Kurtosis and conventional diffusion metric values in the solid region of the tumor and the contralateral NAWM<sup>a</sup>**

| Region         | MK               | AK               | RK               | FA               | MD               | ADC              |
|----------------|------------------|------------------|------------------|------------------|------------------|------------------|
| LGMs           | 0.88 (0.81~0.94) | 0.80 (0.72~0.85) | 0.93 (0.85~0.99) | 0.20 (0.14~0.30) | 1.44 (1.14~1.55) | 0.73 (0.67~0.82) |
| HGMs           | 1.02 (0.91~1.08) | 0.90 (0.81~0.96) | 1.08 (0.97~1.16) | 0.19 (0.16~0.29) | 1.32 (1.12~1.44) | 0.63 (0.60~0.71) |
| NAWM           | 1.01 (0.98~1.05) | 0.85 (0.83~0.87) | 1.10 (1.08~1.15) | 0.36 (0.35~0.38) | 1.42 (1.14~1.54) | 0.60 (0.59~0.63) |
| <i>P</i> value | .001             | .001             | .001             | .925             | .116             | .003             |

**Note:**—NAWM indicates normal-appearing white matter.

<sup>a</sup>Data are medians, with interquartile ranges in parentheses.

**On-line Table 2: Interobserver variability in measurements of meningiomas**

| Region/Metrics            | Intraclass Correlation Coefficient, 95% CI for Interobserver |
|---------------------------|--------------------------------------------------------------|
| Solid region of the tumor |                                                              |
| MK                        | 0.983, 0.969–0.990                                           |
| AK                        | 0.979, 0.963–0.989                                           |
| RK                        | 0.957, 0.923–0.976                                           |
| MD                        | 0.984, 0.971–0.991                                           |
| FA                        | 0.993, 0.987–0.996                                           |
| ADC                       | 0.801, 0.603–0.892                                           |
| NAWM                      |                                                              |
| MK                        | 0.986, 0.975–0.992                                           |
| AK                        | 0.929, 0.873–0.961                                           |
| RK                        | 0.907, 0.833–0.948                                           |
| MD                        | 0.947, 0.905–0.971                                           |
| FA                        | 0.827, 0.688–0.904                                           |
| ADC                       | 0.984, 0.970–0.991                                           |

**Note:**—NAWM indicates normal-appearing white matter.

**On-line Table 3: Comparisons of AUCs among normalized MK, AK, RK, FA, MD, and ADC (part 1)**

| Comparison | Statistic | MK-AK | MK-RK | MK-FA             | MK-MD             | MK-ADC |
|------------|-----------|-------|-------|-------------------|-------------------|--------|
| LGMs-HGMs  | <i>P</i>  | .683  | .221  | .002 <sup>a</sup> | .038 <sup>a</sup> | .135   |
|            | <i>Z</i>  | 0.409 | 1.223 | 3.101             | 2.080             | 1.496  |

**Note:**—AUC indicates area under the curve.

<sup>a</sup>Significant.

**On-line Table 4: Comparisons of AUCs among normalized MK, AK, RK, FA, MD, and ADC (part 2)**

| Comparison | Statistic | AK-RK | AK-FA              | AK-MD | AK-ADC | RK-FA             |
|------------|-----------|-------|--------------------|-------|--------|-------------------|
| LGMs-HGMs  | <i>P</i>  | .740  | <.001 <sup>a</sup> | .076  | .204   | .007 <sup>a</sup> |
|            | <i>Z</i>  | 0.332 | 3.533              | 1.776 | 1.271  | 2.712             |

**Note:**—AUC indicates area under the curve.

<sup>a</sup> Significant.

**On-line Table 5: Comparisons of AUCs among normalized MK, AK, RK, FA, MD, and ADC (part 3)**

|           | Statistic | RK-MD | RK-ADC | FA-MD             | FA-ADC            | MD-ADC |
|-----------|-----------|-------|--------|-------------------|-------------------|--------|
| LGMs-HGMs | <i>P</i>  | .197  | .456   | .021 <sup>a</sup> | .019 <sup>a</sup> | .771   |
|           | <i>Z</i>  | 1.289 | 0.746  | 2.303             | 2.340             | 0.291  |

**Note:**—AUC indicates area under the curve.

<sup>a</sup> Significant.

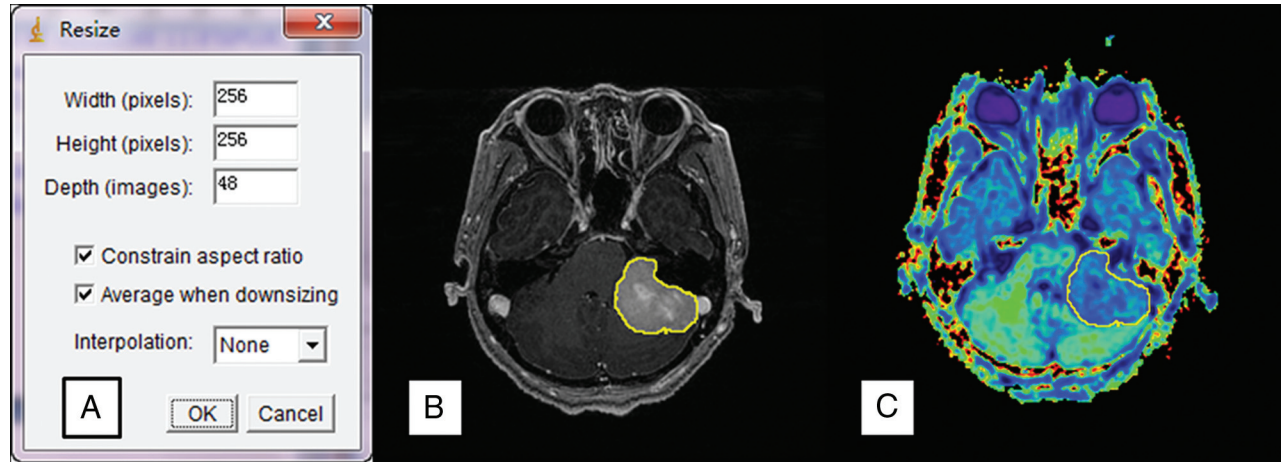

**ON-LINE FIGURE.** Protocols for resizing the enhanced T1 FSPGR image to match the DKI metric maps. *A*, The slice number of enhanced T1 FSPGR should be changed to 48 without interpolation. *B*, The ROI was semiautomatically delineated in the enhanced T1 FSPGR image. *C*, Finally, the ROI was copied to the DKI metric maps.
